# Supplementary material for: Effectiveness of Exergame Intervention on Walking in Older Adults: A Systematic Review and Meta-Analysis of Randomized Controlled Trials
Source: PubMed Central journal article supplement (PMC8459884; doi:10.1093/ptj/pzab152), 2021-06-21
Supplement: supplementary_material_a_pzab152.pdf [file supplementary_material_a_pzab152.pdf]

## SUPPLEMENTARY MATERIAL A: METHODS

In the supplementary material A are

- full electronic search strategy that was done to the MEDLINE (Ovid) database for the literature search (table A1).
- study, participant, intervention and outcome information extracted from the studies included in the review (table A2).
- obtained and confirmed data from original studies (table A3).
- conversion of given results to the mean and SD values (table A4).
- the priority list that defines the order of outcome variables measuring walking for synthesis of the results (table A5).

**Table A1.** The search strategy in the MEDLINE (Ovid) database.

| #  | Searches                                                                                                                                  | Results<br>14.1.2019 | Results<br>10.1.2020 |
|----|-------------------------------------------------------------------------------------------------------------------------------------------|----------------------|----------------------|
| 1  | Video Games/                                                                                                                              | 4534                 | 5104                 |
| 2  | Virtual Reality/                                                                                                                          | 613                  | 1426                 |
| 3  | Virtual Reality Exposure Therapy/                                                                                                         | 448                  | 551                  |
| 4  | virtual reality.mp.                                                                                                                       | 8278                 | 9851                 |
| 5  | augmented reality.mp.                                                                                                                     | 1396                 | 1800                 |
| 6  | mixed reality.mp.                                                                                                                         | 191                  | 273                  |
| 7  | User-Computer Interface/                                                                                                                  | 35191                | 36463                |
| 8  | game technolog*.mp.                                                                                                                       | 44                   | 46                   |
| 9  | gamificati*.mp.                                                                                                                           | 331                  | 481                  |
| 10 | gamified.mp.                                                                                                                              | 126                  | 187                  |
| 11 | exergam*.mp.                                                                                                                              | 496                  | 612                  |
| 12 | computer gam*.mp.                                                                                                                         | 1228                 | 1323                 |
| 13 | wearable computing.mp.                                                                                                                    | 71                   | 84                   |
| 14 | digital rehabilitation.mp.                                                                                                                | 8                    | 12                   |
| 15 | Wii*.mp.                                                                                                                                  | 949                  | 1026                 |
| 16 | Sony Move*.mp.                                                                                                                            | 1                    | 1                    |
| 17 | Xbox*.mp.                                                                                                                                 | 156                  | 176                  |
| 18 | X-box*.mp.                                                                                                                                | 1762                 | 1945                 |
| 19 | Playstation*.mp.                                                                                                                          | 77                   | 79                   |
| 20 | Kinect*.mp.                                                                                                                               | 1006                 | 1156                 |
| 21 | Intel Realsense*.mp.                                                                                                                      | 3                    | 8                    |
| 22 | webcam technology.mp.                                                                                                                     | 3                    | 3                    |
| 23 | motion detection.mp.                                                                                                                      | 1262                 | 1355                 |
| 24 | Motion sensor gam*.mp.                                                                                                                    | 1                    | 1                    |
| 25 | motion-controlled gam*.mp.                                                                                                                | 5                    | 6                    |
| 26 | 1 or 2 or 3 or 4 or 5 or 6 or 7 or 8 or 9 or 10 or 11 or 12 or 13 or 14 or 15 or 16 or 17 or 18 or 19 or 20 or 21 or 22 or 23 or 24 or 25 | 50089                | 54183                |
| 27 | Rehabilitation/ or exp Exercise Therapy/                                                                                                  | 62230                | 66343                |
| 28 | therapeutic exercise.mp.                                                                                                                  | 910                  | 983                  |
| 29 | exp Physical Therapy Modalities/                                                                                                          | 140502               | 148700               |
| 30 | exp Exercise/                                                                                                                             | 173602               | 187759               |
| 31 | physical rehabilitation.mp.                                                                                                               | 1689                 | 1858                 |
| 32 | physiotherap*.mp.                                                                                                                         | 23401                | 25339                |
| 33 | physical therap*.mp.                                                                                                                      | 50567                | 53497                |
| 34 | 27 or 28 or 29 or 30 or 31 or 32 or 33                                                                                                    | 337782               | 360238               |
| 35 | Randomized Controlled Trials as Topic/                                                                                                    | 120416               | 129932               |
| 36 | randomized controlled trial/                                                                                                              | 474451               | 498448               |
| 37 | Random Allocation/                                                                                                                        | 97207                | 101853               |
| 38 | Double-Blind Method/                                                                                                                      | 149037               | 155671               |
| 39 | Single Blind Method/                                                                                                                      | 26115                | 27955                |
| 40 | clinical trial/                                                                                                                           | 514077               | 520737               |
| 41 | clinical trial, phase i.pt.                                                                                                               | 18563                | 19850                |
| 42 | clinical trial, phase ii.pt.                                                                                                              | 29941                | 31917                |
| 43 | clinical trial, phase iii.pt.                                                                                                             | 14503                | 16174                |
| 44 | clinical trial, phase iv.pt.                                                                                                              | 1632                 | 1818                 |
| 45 | controlled clinical trial.pt.                                                                                                             | 92865                | 93516                |
| 46 | randomized controlled trial.pt.                                                                                                           | 474451               | 498448               |
| 47 | multicenter study.pt.                                                                                                                     | 243805               | 264599               |
| 48 | clinical trial.pt.                                                                                                                        | 514077               | 520737               |
| 49 | exp Clinical Trials as topic/                                                                                                             | 320731               | 335578               |
| 50 | 35 or 36 or 37 or 38 or 39 or 40 or 41 or 42 or 43 or 44 or 45 or 46 or 47 or 48 or 49                                                    | 1271424              | 1338136              |
| 51 | (clinical adj trial\$.tw.                                                                                                                 | 323540               | 351381               |
| 52 | ((singl\$ or doubl\$ or treb\$ or tripl\$) adj (blind\$3 or mask\$3)).tw.                                                                 | 161134               | 168770               |
| 53 | PLACEBOS/                                                                                                                                 | 34190                | 34687                |
| 54 | placebo\$.tw.                                                                                                                             | 201037               | 210823               |
| 55 | randomly allocated.tw.                                                                                                                    | 25520                | 27572                |
| 56 | (allocated adj2 random\$).tw.                                                                                                             | 28631                | 30811                |
| 57 | 51 or 52 or 53 or 54 or 55 or 56 or 57                                                                                                    | 576243               | 615001               |
| 58 | 50 or 57                                                                                                                                  | 1506846              | 1593063              |
| 59 | case report.tw.                                                                                                                           | 282087               | 300339               |
| 60 | letter/                                                                                                                                   | 1012544              | 1058044              |
| 61 | historical article/                                                                                                                       | 349577               | 356143               |
| 62 | 59 or 60 or 61                                                                                                                            | 1629568              | 1699138              |
| 63 | 58 not 62                                                                                                                                 | 1472735              | 1557049              |
| 64 | 26 and 34 and 63                                                                                                                          | 673                  | 765                  |
|    |                                                                                                                                           |                      | 51                   |

**Table A2.** Study, participant, intervention and outcome information extracted from the studies included in the review.

| <b>Domain</b>               | <b>Extracted data</b>                                                                                                                                                                                                                                                                                                      |
|-----------------------------|----------------------------------------------------------------------------------------------------------------------------------------------------------------------------------------------------------------------------------------------------------------------------------------------------------------------------|
| <b>Study Identification</b> | Country, sources of funding and author information                                                                                                                                                                                                                                                                         |
| <b>Methods</b>              | Study design and aim of the study                                                                                                                                                                                                                                                                                          |
| <b>Population</b>           | Inclusion and exclusion criteria, group differences, characteristics' of participant as described in the studies                                                                                                                                                                                                           |
| <b>Interventions</b>        | Description of the interventions in experimental and comparison groups: duration, setting, type of training, used technology, guidance, exercise program (sessions in week, session time, session description, progression), adherence, follow-up procedure, additional information that review author wanted to highlight |
| <b>Outcomes</b>             | Outcomes measuring walking measured at baseline, after intervention and when available, after follow-up period (name, type, unit of measurement, measured values, number of participants analyzed, direction (lower/upper is better), data value (endpoint/change from baseline))                                          |
|                             | Main results of outcomes measuring walking                                                                                                                                                                                                                                                                                 |

**Table A3.** Information requested from original studies (n=18) and actions made.

| Study                                                                                              | Reason for request                                                                                                | Response                                                                           | Actions                                                                                             |
|----------------------------------------------------------------------------------------------------|-------------------------------------------------------------------------------------------------------------------|------------------------------------------------------------------------------------|-----------------------------------------------------------------------------------------------------|
| <b>Chow &amp; Mann 2015</b> <sup>1</sup>                                                           | TUG change from baseline results reported (t test)                                                                | Endpoint Mean and SD values received via email                                     | Endpoint values added to data extraction                                                            |
| <b>Fung et al. 2012</b> <sup>2</sup>                                                               | 2MWT results reported as change% from baseline                                                                    | Numerical data not received                                                        | Study excluded from meta-analysis                                                                   |
| <b>Htut et al. 2018</b> <sup>3</sup>                                                               | TUG results presented graphically                                                                                 | Endpoint Mean and SD values received via email.                                    | Endpoint values added to data extraction                                                            |
| <b>Khushnood et al. 2019</b> <sup>4</sup>                                                          | Participants' ages not reported                                                                                   | Mean age of participants under 60 years of old (information received via email)    | Study excluded from the review (Reason: Wrong population)                                           |
| <b>Lauzé et al. 2017</b> <sup>5</sup>                                                              | TUG and Walking Speed results reported as change from baseline                                                    | Endpoint Mean and SD values not received                                           | Change values are used in meta-analysis (the groups did not differ at baseline)                     |
| <b>Liao, Chen, &amp; Wang 2019</b> <sup>6</sup> ; <b>Liao, Chen, Lin, et al. 2019</b> <sup>7</sup> | Participants might be same in studies                                                                             | Requested information not received                                                 | Liao et al. 2019 excluded from meta-analysis (Reason: Participant definition in trial registration) |
| <b>Lin et al. 2007</b> <sup>8</sup>                                                                | Comparison of pre- and post-intervention values for Walking Speed on four different terrains perented graphically | Numerical data not received                                                        | Study excluded from meta-analysis                                                                   |
| <b>Maillot et al. 2012</b> <sup>9</sup>                                                            | TUG and 6MWT results reported as change from baseline                                                             | Endpoint Mean and SD values received via email.                                    | Endpoint values added to data extraction                                                            |
| <b>Mirelman et al. 2016</b> <sup>10</sup>                                                          | Study participants were from three cohorts, one of which included participants with neurological disorder.        | 2MWT results received by three cohorts.                                            | Two cohorts, which matched review's inclusion criteria, added to meta-analysis                      |
| <b>Monteiro-Junior et al. 2017</b> <sup>11</sup>                                                   | TUG and Walking speed results reported as change from baseline                                                    | Endpoint Mean and SD values received via email.                                    | Endpoint values added to data extraction                                                            |
| <b>Ray et al. 2012</b> <sup>12</sup>                                                               | Baseline characteristics information by groups not reported                                                       | Participant data not received                                                      | Information remains missing from narrative synthesis                                                |
| <b>Sajid et al. 2016</b> <sup>13</sup>                                                             | 6MWT results not reported                                                                                         | Results are not available to studies past 8 years (Information received via email) | Study excluded from meta-analysis                                                                   |
| <b>Santamaría et al. 2018</b> <sup>14</sup>                                                        | TUG results reported as p-values                                                                                  | Endpoint Mean and SD values received via email.                                    | Endpoint values added to data extraction                                                            |
| <b>Smaerup et al. 2015</b> <sup>15</sup>                                                           | DGI results reported as change from baseline                                                                      | Endpoint Mean and SD values not received                                           | Change values are used in meta-analysis (the groups did not differ at baseline)                     |

|                                              |                                                                                           |                                                 |                                          |
|----------------------------------------------|-------------------------------------------------------------------------------------------|-------------------------------------------------|------------------------------------------|
| <b>Szturm et al. 2011</b> <sup>16</sup>      | TUG results reported as change from baseline, Walking Speed results presented graphically | Endpoint Mean and SD values received via email  | Endpoint values added to data extraction |
| <b>Tollar et al. 2019</b> <sup>17</sup>      | 6MWT and DGI post-intervention values not reported                                        | Endpoint Mean and SD values received via email  | Endpoint values added to data extraction |
| <b>Uzor &amp; Baillie 2019</b> <sup>18</sup> | Walking speed results presented graphically                                               | Endpoint Mean and SD values received via email. | Endpoint values added to data extraction |

**Table A4.** Calculation of the mean and standard deviation (SD) values in RCTs (n=7).

| Study                                        | Reported outcomes            | Values calculated | Method                                           |
|----------------------------------------------|------------------------------|-------------------|--------------------------------------------------|
| <b>Bieryla &amp; Dold 2013</b> <sup>19</sup> | median, lower IQR, upper IQR | mean, SD          | Recommendation {q1, m, q3; n} <sup>20</sup>      |
| <b>Bieryla 2016</b> <sup>21</sup>            | median, lower IQR, upper IQR | mean, SD          | Recommendation {q1, m, q3; n} <sup>20</sup>      |
| <b>Eggenberger et al. 2015</b> <sup>22</sup> | mean, SE                     | SD                | $SD=SE*\sqrt{N}$                                 |
| <b>Pichierri et al. 2012</b> <sup>23</sup>   | median, lower IQR, upper IQR | mean, SD          | Recommendation {q1, m, q3; n} <sup>20</sup>      |
| <b>Rendon et al. 2012</b> <sup>24</sup>      | median, min, max             | mean, SD          | Recommendation {a, m, b; n} <sup>20</sup>        |
| <b>Schättin et al. 2016</b> <sup>25</sup>    | median, lower IQR, upper IQR | mean, SD          | Recommendation {q1, m, q3; n} <sup>20</sup>      |
| <b>Smaerup et al. 2015</b> <sup>15</sup>     | mean, lower CI, upper CI     | SD                | $SD=\sqrt{N}*(upper\ CI-lower\ CI)/2*\text{inv}$ |

**Table A5.** The priority list of outcome variables measuring walking in the studies included in the review.

| # | Measurement                                                  | Unit of result               | Direction | Incidence | Validity             | Reliability                                              | References |
|---|--------------------------------------------------------------|------------------------------|-----------|-----------|----------------------|----------------------------------------------------------|------------|
| 1 | Timed "Up & Go" *)<br>(e.g. TUG, 8ftUG, iTUG)                | second                       | ↓         | 40        | 2-3/3                | Test-retest: 4/4<br>Inter-rater: 4/4<br>Intra-rater: 4/4 | 26-29      |
| 2 | Walking speed*)<br>(e.g. 4-m test, 10-m test, GAITRite)      | milli-second, second, minute | ↑         | 23        | 3/3<br>Normal pace ↑ | Test-retest: 3-4/4<br>Inter-rater: 4/4                   | 27,29-33   |
| 3 | 2MWT, 6MWT                                                   | feet, yard, meter            | ↑         | 16        | 3/3                  | Test-retest: 4/4<br>Inter-rater: 4/4                     | 29,34-36   |
| 4 | Functional Gait Assessment, Dynamic Gait Index, Tinetti Gait | score                        | ↑         | 9         | 2-3/3                | Test-retest: 4/4<br>Inter-rater: 3/4<br>Intra-rater: 3/4 | 27,37-41   |

Validity: 1/3 = small [ $r < .03$ ], 2/3 = medium [ $r = .03-.05$ ], 3/3 = large [ $r > .05$ ] <sup>42</sup>  
Reliability: 1/4 = poor [ICC < .05], 2/4 = moderate [ICC = .5-.75], 3/4 = good [ICC = .75-.9], 4/4 = excellent [ICC > .90] <sup>43</sup>  
\*) Single-task

## REFERENCES

1. Chow DHK, Mann SKF. Effect of cyber-golfing on balance amongst the elderly in Hong Kong: A pilot randomised trial. *Hong Kong J Occup Ther.* 2015;26:9-13. doi:10.1016/j.hkjot.2015.08.001
2. Fung V, Ho A, Shaffer J, Chung E, Gomez M. Use of Nintendo Wii Fit™ in the rehabilitation of outpatients following total knee replacement: A preliminary randomised controlled trial. *Physiotherapy.* 2012;98:183-188. doi:10.1016/j.physio.2012.04.001
3. Htut TZC, Hiengkaew V, Jalayondeja C, Vongsirinavarat M. Effects of physical, virtual reality-based, and brain exercise on physical, cognition, and preference in older persons: A randomized controlled trial. *Eur Rev Aging Phys Act.* 2018;15:1-12. doi:10.1186/s11556-018-0199-5
4. Khushnood K, Sultan N, Mehmood R, Qureshi S, Tariq H, Amjad I. Does Wii Fit balance training improve balance and reduce fall risk in diabetic patients as compared to balance training exercises? *Rawal Med J.* 2019;44:44-48.
5. Lauzé M, Martel D, Aubertin-Leheudre M. Feasibility and effects of a physical activity program using gerontechnology in assisted living communities for Older Adults. *J Am Med Dir Assoc.* 2017;18:1069-1075. doi:10.1016/j.jamda.2017.06.030
6. Liao, Y. Y.; Chen, I. H.; Wang RY. Effects of Kinect-based exergaming on frailty status and physical performance in prefrail and frail elderly: A randomized controlled trial. *Sci Rep.* 2019;9.
7. Liao Y-Y, Chen I-H, Lin Y-J, Chen Y, Hsu W-C. Effects of virtual reality-based physical and cognitive training on executive function and dual-task gait performance in

older adults with mild cognitive impairment: A randomized control trial. *Front Aging Neurosci.* 2019;11:1-10. doi:10.3389/fnagi.2019.00162

8. Lin DH, Lin YF, Chai HM, Han YC, Jan MH. Comparison of proprioceptive functions between computerized proprioception facilitation exercise and closed kinetic chain exercise in patients with knee osteoarthritis. *Clin Rheumatol.* 2007;26:520-528. doi:10.1007/s10067-006-0324-0
9. Maillot P, Perrot A, Hartley A. Effects of interactive physical-activity video-game training on physical and cognitive function in older adults. *Psychol Aging.* 2012;27:589-600. doi:10.1037/a0026268
10. Mirelman A, Rochester L, Maidan I, et al. Addition of a non-immersive virtual reality component to treadmill training to reduce fall risk in older adults (V-TIME): A randomised controlled trial. *Lancet.* 2016;388:1170-1182. doi:10.1016/S0140-6736(16)31325-3
11. Monteiro-Junior RS, Figueiredo LFDS, Maciel-Pinheiro PDT, et al. Virtual reality-based physical exercise with exergames (PhysEx) improves mental and physical health of institutionalized older adults. *J Am Med Dir Assoc.* 2017;18:454.e1-454.e9. doi:10.1016/j.jamda.2017.01.001
12. Ray C, Melton F, Ramirez R, Keller D. The effects of a 15-week exercise intervention on fitness and postural control in older adults. *Act Adapt Aging.* 2012;36:227-241. doi:10.1080/01924788.2012.696236
13. Sajid S, Dale W, Mustian K, et al. Novel physical activity interventions for older patients with prostate cancer on hormone therapy: A pilot randomized study. *J Geriatr Oncol.* 2016;7:71-80. doi:10.1016/j.jgo.2016.02.002

14. Santamaría KG, Fonseca AS, Jiménez JM, Mora LCS. Balance, attention and concentration improvements following an exergame training program in elderly. *Retos-Nuevas Tendencias En Educ Fis Deport Y Recreacion*. 2018;2041:102-105.
15. Smaerup M, Grönvall E, Larsen SB, Laessoe U, Henriksen J-J, Damsgaard EM. Computer-assisted training as a complement in rehabilitation of patients with chronic vestibular dizziness: A randomized controlled trial. *Arch Phys Med Rehabil*. 2015;96:395-401. doi:10.1016/j.apmr.2014.10.005
16. Szturm T, Betker AL, Moussavi Z, Desai A, Goodman V. Effects of an interactive computer game exercise regimen on balance impairment in frail community-dwelling older adults: A randomized controlled trial. *Phys Ther*. 2011;91:1449-1462. doi:10.2522/ptj.20090205
17. Tollar J, Nagy F, Moizis M, Toth BE, Sanders LMJ, Hortobagyi T. Diverse exercises similarly reduce older adults' mobility limitations. *Med Sci Sports Exerc*. 2019;51:1809-1816. doi:10.1249/MSS.0000000000002001
18. Uzor S, Baillie L. Recov-R: Evaluation of a home-based tailored exergame system to reduce fall risk in seniors. *Acm Trans Comput Interact*. 2019;26. doi:10.1145/3325280
19. Bieryla KA, Dold NM. Feasibility of Wii Fit training to improve clinical measures of balance in older adults. *Clin Interv Aging*. 2013;8:775-781. doi:10.2147/CIA.S46164
20. Wan X, Wang W, Liu J, Tong T. Estimating the sample mean and standard deviation from the sample size, median, range and/or interquartile range. *BMC Med Res Methodol*. 2014;14:1-13. doi:10.1186/1471-2288-14-135
21. Bieryla KA. Xbox Kinect training to improve clinical measures of balance in older adults: A pilot study. *Aging Clin Exp Res*. 2016;28:451-457. doi:10.1007/s40520-015-



22. Eggenberger P, Theill N, Holenstein S, Schumacher V, de Bruin ED. Multicomponent physical exercise with simultaneous cognitive training to enhance dual-task walking of older adults: A secondary analysis of a 6-month randomized controlled trial with 1-year follow-up. *Clin Interv Aging*. 2015;10:1711-1732. doi:10.2147/CIA.S91997
23. Pichierri G, Murer K, de Bruin ED. A cognitive-motor intervention using a dance video game to enhance foot placement accuracy and gait under dual task conditions in older adults: A randomized controlled trial. *BMC Geriatr*. 2012;12:74. doi:10.1186/1471-2318-12-74
24. Rendon AA, Lohman EB, Thorpe D, Johnson EG, Medina E, Bradley B. The effect of virtual reality gaming on dynamic balance in older adults. *Age Ageing*. 2012;41:549-552. doi:10.1093/ageing/afs053
25. Schättin A, Arner R, Gennaro F, de Bruin ED. Adaptations of prefrontal brain activity, executive functions, and gait in healthy elderly following exergame and balance training: A randomized-controlled study. *Front Aging Neurosci*. 2016;8. doi:10.3389/fnagi.2016.00278
26. Christopher A, Kraft E, Olenick H, Kiesling R, Doty A. The reliability and validity of the Timed Up and Go as a clinical tool in individuals with and without disabilities across a lifespan: a systematic review: Psychometric properties of the Timed Up and Go. *Disabil Rehabil*. Published online 2019. doi:10.1080/09638288.2019.1682066
27. van Iersel MB, Munneke M, Esselink RAJ, Benraad CEM, Olde Rikkert MGM. Gait velocity and the Timed-Up-and-Go test were sensitive to changes in mobility in frail elderly patients. *J Clin Epidemiol*. 2008;61:186-191. doi:10.1016/j.jclinepi.2007.04.016

28. Rydwick E, Bergland A, Forsén L, Frändin K. Psychometric properties of Timed Up and Go in elderly people: A systematic review. *Phys Occup Ther Geriatr.* 2011;29:102-125. doi:10.3109/02703181.2011.564725
29. Steffen TM, Hacker TA, Mollinger L. Age- and gender-related test performance in community-dwelling elderly people: Six-minute Walk Test, Berg Balance Scale, Timed Up & Go Test, and Gait Speed. *Phys Ther.* 2002;82:128-137.
30. Bilney B, Morris M, Webster K. Concurrent related validity of the GAITRite walkway system for quantification of the spatial and temporal parameters of gait. *Gait Posture.* 2003;17:68-74. doi:10.1016/S0966-6362(02)00053-X
31. Kim H, Park I, Lee H joo, Lee O. The reliability and validity of gait speed with different walking pace and distances against general health, physical function, and chronic disease in aged adults. *J Exerc Nutr Biochem.* 2016;20:46-50. doi:10.20463/jenb.2016.09.20.3.7
32. Peters DM, Fritz SL, Krotish DE. Assessing the reliability and validity of a shorter walk test compared with the 10-Meter Walk Test for measurements of gait speed in healthy, older adults. *J Geriatr Phys Ther.* 2013;36:24-30. doi:10.1519/JPT.0b013e318248e20d
33. Rydwick E, Bergland A, Forsén L, Frändin K. Investigation into the reliability and validity of the measurement of elderly people's clinical walking speed: A systematic review. *Physiother Theory Pract.* 2012;28:238-256. doi:10.3109/09593985.2011.601804
34. Bean JF, Kiely DK, Leveille SG, et al. The 6-minute walk test in mobility-limited elders: What is being measured? *Journals Gerontol - Ser A Biol Sci Med Sci.* 2002;57. doi:10.1093/gerona/57.11.M751
35. Chan WLS, Pin TW. Reliability, validity and minimal detectable change of 2-minute

- walk test, 6-minute walk test and 10-meter walk test in frail older adults with dementia. *Exp Gerontol.* 2019;115:9-18. doi:10.1016/j.exger.2018.11.001
36. Connelly DM, Thomas BK, Cliffe SJ, Perry WM, Smith RE. Clinical utility of the 2-minute walk test for older adults living in long-term care. *Physiother Canada.* 2009;61:78-87. doi:10.3138/physio.61.2.78
  37. Parveen H, Noohu MM. Evaluation of psychometric properties of Tinetti performance-oriented mobility assessment scale in subjects with knee osteoarthritis. *Hong Kong Physiother J.* 2017;36:25-32. doi:10.1016/j.hkpj.2016.07.001
  38. Whitney S, Wrisley D, Furman J. Concurrent validity of the Berg Balance Scale and the Dynamic Gait Index in people with vestibular dysfunction. *Physiother Res Int.* 2003;8:178-186. doi:10.1002/pri.288
  39. Wrisley DM, Walker ML, Echternach JL, Strasnick B. Reliability of the Dynamic Gait Index in people with vestibular disorders. *Arch Phys Med Rehabil.* 2003;84:1528-1533. doi:10.1016/S0003-9993(03)00274-0
  40. Wrisley DM, Marchetti GF, Kuharsky DK, Whitney SL. Reliability, internal consistency, and validity of data obtained with the functional gait assessment. *Phys Ther.* 2004;84:906-918. doi:10.1093/ptj/84.10.906
  41. Wrisley DM, Kumar N. Functional Gait Assessment : Concurrent, discriminative, and predictive validity in community dwelling older adults. *Phys Ther.* 2010;90:1-13. doi:10.2522/ptj.20090069
  42. Cohen J. A Power Primer. *Quant methods Psychol.* 1992;112:155-159. doi:10.1037/0033-2909.112.1.155

43. Koo TK, Li MY. A Guideline of Selecting and Reporting Intraclass Correlation Coefficients for Reliability Research. *J Chiropr Med*. 2016;15:155-163. doi:10.1016/j.jcm.2016.02.012
